# Supplementary material
Source: PubMed Central journal article supplement (PMC3903256)
Supplement: 1316483111_sapp.pdf [file 1316483111_sapp.pdf]

## Supporting Information for

### A copper-sulfenic acid complex from oxidation of a cavity mutant of *Pseudomonas aeruginosa* azurin

**Authors:** Nathan A. Sieracki, Shiliang Tian, Ryan G. Hadt, Jun-Long Zhang, Julia S. Woertink, Mark J. Nilges, Furong Sun, Edward I. Solomon, Yi Lu

**Site-directed mutagenesis and protein purification.** Plasmid containing the M121G mutation was constructed by site-directed mutagenesis using wild-type azurin (pET9a) as the template using the Quik-Change mutagenesis procedure with the forward primer 5'-CAC-TCC-GCA-CTG-GGG-AAA-GGT-ACC-3' and the corresponding complementary reverse primer. The mutation was confirmed via sequencing using a T7 promoter. The protein was expressed in BL-21\* *E. Coli* (Novagen, Madison, WI) and purified according to published procedures.(1, 2) Electrospray ionization mass spectrometry confirmed the identity of the isolated variant (MW = 13871; MW<sub>cal</sub> = 13871.67).

**Spectroscopic measurements.** UV-vis absorption spectra were obtained at room temperature on an HP Agilent 8453 diode array spectrometer. An extinction coefficient of 9800 M<sup>-1</sup>cm<sup>-1</sup> at 280 nm was used to determine the concentration of purified protein.(3) All UV-vis spectra were recorded in 50 mM potassium phosphate pH 7.0 buffer unless otherwise noted. X-band EPR measurements were collected at 30 K on a Varian-122 spectrometer equipped with an Air Products Helitran cryostat and temperature controller, with a collection frequency of 9.05 GHz, power of 0.2 mW and field modulation of 4.0 G. EPR spectra were recorded with 20% glycerol in 50 mM temperature-independent-pH (TIP) pH 7.0 buffer (4).

**Mass spectrometry measurements.** The mass spectra of the proteins were acquired using a Waters Quattro II spectrometer operating in positive-ion mode. Samples (10 μL of 20 μM protein in ammonium acetate buffer) were injected into a flow of 50 μL/min of 50% CH<sub>3</sub>CN/H<sub>2</sub>O mobile phase and integrated over the first minute of detection. Unless otherwise noted, protein samples were first treated with a 1:10 volume of 1% v/v formic acid immediately prior to injection. Syringe pump mass spectra were obtained with directly injecting 0.2 mM protein in 10 mM ammonium acetate pH 6.0 into the spectrometer at a rate of 5 μL/min. The mass spectra were collected from 500-2000 m/z and were deconvoluted using the MassLinx software package with a 1 Da resolution and a 10,000-20,000 Da calculation window.

**Preparation of Cu(II)-M121G azurin.** Aliquots of metal-free (apo-) M121G azurin (1.5-2.0 mL) in 50 mM ammonia acetate buffer pH 6.35 were titrated with 2 eq. Cu(II) (from a stock solution of 50 mM CuSO<sub>4</sub>) and stirred at room temperature for 30 minutes. Excess copper was removed using a PD-10 desalting column containing 8.3 ml of Sephadex<sup>TM</sup> G-25 medium. The buffer was exchanged to 50 mM

potassium phosphate buffer (pH 7.0) with Amicon<sup>®</sup> Ultra-4 centrifugal filter devices with a 10 kDa molecular weight cutoff.

**Crystallography.** Crystals of Cu(II)-M121G azurin suitable for X-ray diffraction grew over three days at 4 °C using the hanging drop method, which consisted of suspension of a 2  $\mu$ L droplet containing 1  $\mu$ L apo-M121G azurin (1.3 mM) in 100 mM NaOAc pH 5.6 buffer and 1  $\mu$ L PEG buffer (25% PEG 4000 containing 100 mM LiNO<sub>3</sub>, 10 mM CuSO<sub>4</sub> and 100 mM Tris pH 8.0) above 250  $\mu$ L well buffer (25% PEG 4000 containing 100 mM LiNO<sub>3</sub> 10 mM CuSO<sub>4</sub> and 100 mM Tris pH 8.0). The structure was solved by molecular replacement using AutoMR docked in Phenix (5). The crystal structure of wild type azurin (PDB: 4AZU) was used as a searching model.

**Preparation of Cu(I)-M121G azurin.** The Cu(II)-M121G azurin (1.0 ml of 2.0 mM protein in 50 mM potassium phosphate buffer, pH 7.0) was degassed with argon on a Schlenk line and was then transferred into a glove bag. The Cu(II)-M121G azurin was then reduced by slow addition of solid sodium ascorbate containing 10%mol N, N, N', N' – tetramethyl-p-phenylenediamine (TMPD) as a mediator until the protein solution turned completely colorless. The resulting solution was purified via PD-10 desalting column to remove excess reductant.

**Reaction of Cu(I)-M121G azurin with H<sub>2</sub>O<sub>2</sub>.** To 2.0 ml 0.9 mM Cu(I)-M121G azurin in 50 mM potassium phosphate buffer (pH 7.0) was added 5 eq. H<sub>2</sub>O<sub>2</sub> at room temperature under stirring. The color of the solution changed from colorless to green in an hour. The excess H<sub>2</sub>O<sub>2</sub> was removed either by running through PD-10 desalting column or buffer exchanging with Amicon<sup>®</sup> Ultra-0.5 centrifugal filter devices with a 10 kDa molecular weight cutoff.

**Resonance Raman Spectroscopy.** Resonance Raman (rR) spectra were obtained in an  $\sim$ 135° backscattering configuration with incident powers ranging from  $\sim$ 20 – 50 mW using either a Coherent I90C-K Kr<sup>+</sup> CW ion laser (647.1 nm laser line) or a Coherent Innova Sabre 25/7 Ar<sup>+</sup> CW ion laser (457.9 nm laser line). Scattered light was dispersed through a triple monochromator (Spex 1877 CP, with 1200, 1800, and 2400 groove/mm gratings) and detected with an Andor Newton charge-coupled device (CCD) detector cooled to -80° C. Samples were contained in NMR tubes immersed in a liquid nitrogen finger dewar. Background spectra were obtained using either buffer or charcoal at 77 K in an NMR tube. Raman energies were calibrated using Na<sub>2</sub>SO<sub>4</sub> and citric acid. Frequencies are accurate to within 2 cm<sup>-1</sup>.

**Capture and detection of sulfenic acid with dimedone.** The green solution from the previous step (200  $\mu$ L of 0.2 mM protein) was treated with dimedone (64  $\mu$ L of 250 mM stock) immediately followed by addition of 200  $\mu$ L denaturation solution containing 6 M guanidine hydrochloride, 10 mM EDTA and 100

mM Bis-Tris, pH 7.4. The mixture was stirred at room temperature for 30 minutes. After labeling, the resulting solution was exchanged into water by ultrafiltration using an Amicon® Ultra-0.5 10 K centrifugal filter device for further mass spectroscopic studies.

**Trypsin digest and HPLC MS/MS analysis.** Trypsin digest and HPLC MS/MS analysis were carried by the Protein Science Facility in the Biotechnology Center at the University of Illinois at Urbana-Champaign. Samples were digested with trypsin for 15 minutes at 55 °C using a CEM Liberty microwave digester (CEM Corporation, Matthews, NC). The digested products were analyzed on a Thermo Scientific Velos Pro mass spectrometer with a Dionex RSLCnano Ultimate 3000 UPLC front end using an Acclaim PepMap RSLC (75 micron X 15 cm, C18 2 micron 100 Angstrom) column (Thermo Scientific) with a linear gradient of 1 to 60 % acetonitrile in 0.1 % formic acid over 120 minutes. The data were analyzed using the Mascot database search engine (Matrix Science, London) and searched against a custom database containing the mutant M121G Azurin sequence.

**Calculations.** All DFT calculations were carried out using the Gaussian 09 software (6). For all calculations the B3LYP (7) functional was used in the unrestricted format. For the small models, a TZVP (8) basis set on all atoms was used for all calculations. For the large models, a split 6-311G(d) (on Cu, ligating atoms, and O's on the oxidized thiolate, either bound or unbound)) and 6-31G(d) (9-11) (all other atoms) basis set was used. All molecular orbital compositions were determined using the QMForge program (12) (Mulliken population analyses), and all orbital surfaces were generated using the  $\beta$ -LUMO program (13). The M121G crystal structure was used for a starting point for all models considered. Geometry optimizations using small models involved  $C_{\alpha}$  constraints, while large model constraints included  $C_{\alpha}$  and protein backbone O and N atoms. All reported energies and single point calculations (e.g., EPR and time dependent DFT (TDDFT)) have been environment corrected using a PCM model ( $\epsilon = 4.0$ ) (14). TDDFT calculations were simulated using the SWizard program revision 4.6 (15, 16) using Gaussian band-shapes with half-widths of 2000  $\text{cm}^{-1}$ . Wave function stability checks were carried out to ensure they represented energetic minima.

### Supporting References:

1. Chang TK, *et al.* (1991) Gene synthesis, expression, and mutagenesis of the blue copper proteins azurin and plastocyanin. *Proc. Natl. Acad. Sci.* 88(4):1325-1329.
2. Di Bilio AJ, *et al.* (1992) Electronic absorption spectra of M(II)(Met121X) azurins (M=Co, Ni, Cu; X=Leu, Gly, Asp, Glu): charge-transfer energies and reduction potentials. *Inorg. Chim. Acta* 198-200:145-148.
3. van Pouderoyen G, *et al.* (1996) Spectroscopic and Mechanistic Studies of Type-1 and Type-2 Copper Sites in *Pseudomonas aeruginosa* Azurin As Obtained by Addition of External Ligands to Mutant His46Gly. *Biochemistry* 35(5):1397-1407.
4. Sieracki NA, Hwang HJ, Lee MK, Garner DK, & Lu Y (2008) A temperature independent pH (TIP) buffer for biomedical biophysical applications at low temperatures. *Chem. Commun.* (7):823-825.

5. Adams PD, *et al.* (2010) PHENIX: a comprehensive Python-based system for macromolecular structure solution. *Acta Crystallogr. Sect. D* 66(2):213-221.
6. Frisch MJ, *et al.* (2009) Gaussian 09. Gaussian, Inc. Wallingford, CT.
7. Becke AD (1993) Density-functional thermochemistry. III. The role of exact exchange. *J. Chem. Phys.* 98:5648-5652.
8. Schaefer A, Huber C, & Ahlrichs R (1994) Fully optimized contracted Gaussian basis sets of triple zeta valence quality for atoms Li to Kr. *J. Chem. Phys.* 100:5829-5835.
9. Francl MM, *et al.* (1982) Self-consistent molecular orbital methods. XXIII. A polarization-type basis set for second-row elements. *J. Chem. Phys.* 77:3654-3665.
10. Hariharan PC & Pople JA (1973) Influence of polarization functions on MO hydrogenation energies. *Theor. Chim. Acta* 28:213-222.
11. Rassolov VA, Pople JA, Ratner MA, & Windus TL (1998) 6-31G\* basis set for atoms K through Zn. *J. Chem. Phys.* 109:1223-1229.
12. Tenderholt AL QMForge: A Program to Analyze Quantum Chemistry Calculations. Version 2.1.
13. Kieber-Emmons MT (2011) Lumo. Version 0.9b. Burlingame, CA.
14. Miertus S, Scrocco E, & Tomasi J (1981) Electrostatic interaction of a solute with a continuum. A direct utilization of ab initio molecular potentials for the prevision of solvent effects. *Chem. Phys.* 55:117-129.
15. Gorelsky SI & Lever ABP (2001) Electronic structure and spectra of ruthenium diimine complexes by density functional theory and INDO/S. Comparison of the two methods. *J. Organomet. Chem.* 635:187-196.
16. Gorelsky SI (2013) SWizard program. University of Ottawa, Ottawa, Canada.

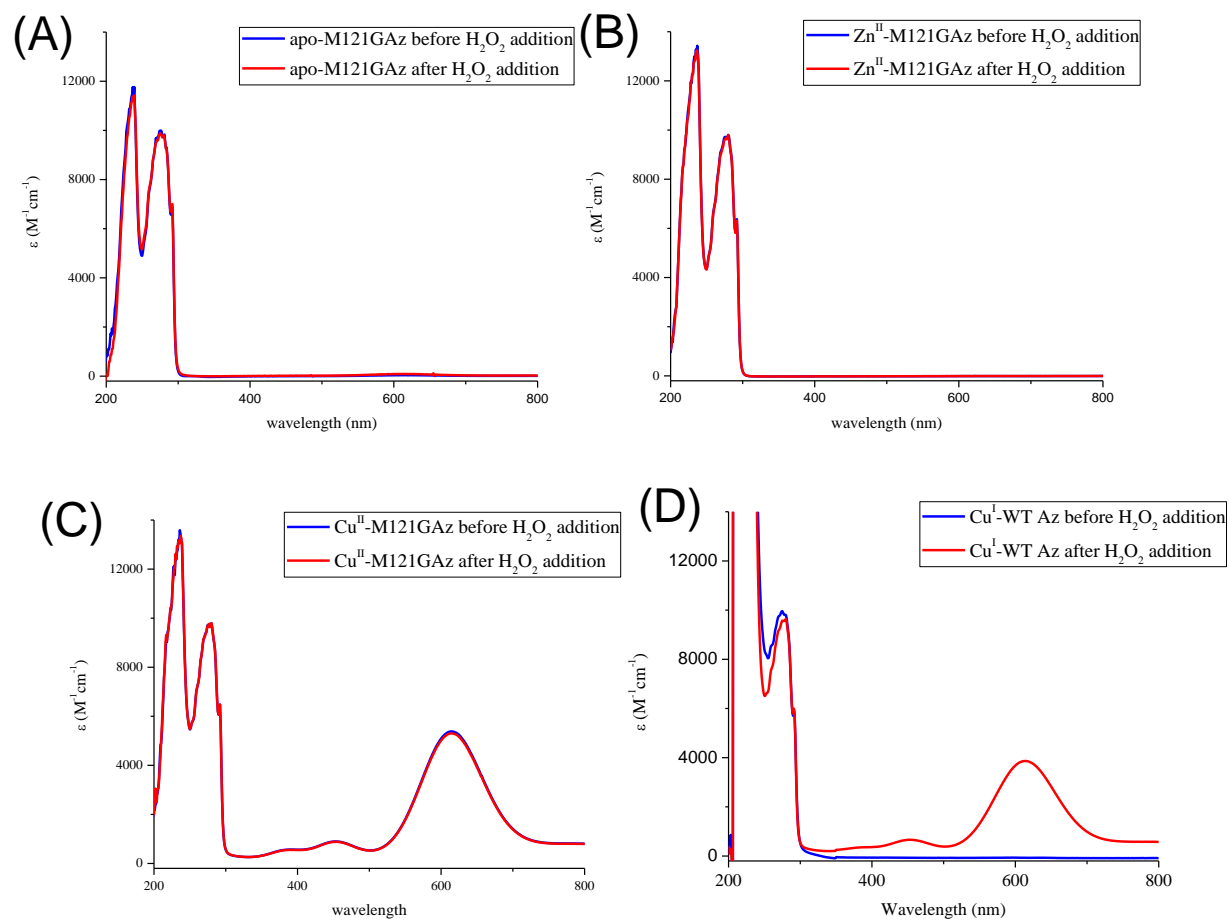

**Fig. S1.** UV-vis spectrum upon addition of 5 eq.  $H_2O_2$  to (A) apo-M121G Az, (B)  $Zn^{II}$ -M121G Az, (C)  $Cu^{II}$ -M121G azurin and (D)  $Cu^I$ -WT azurin in 50 mM KPi buffer pH 7.0. Spectra in blue were obtained before  $H_2O_2$  addition, while spectra in red were obtained 30 minutes after  $H_2O_2$  addition.

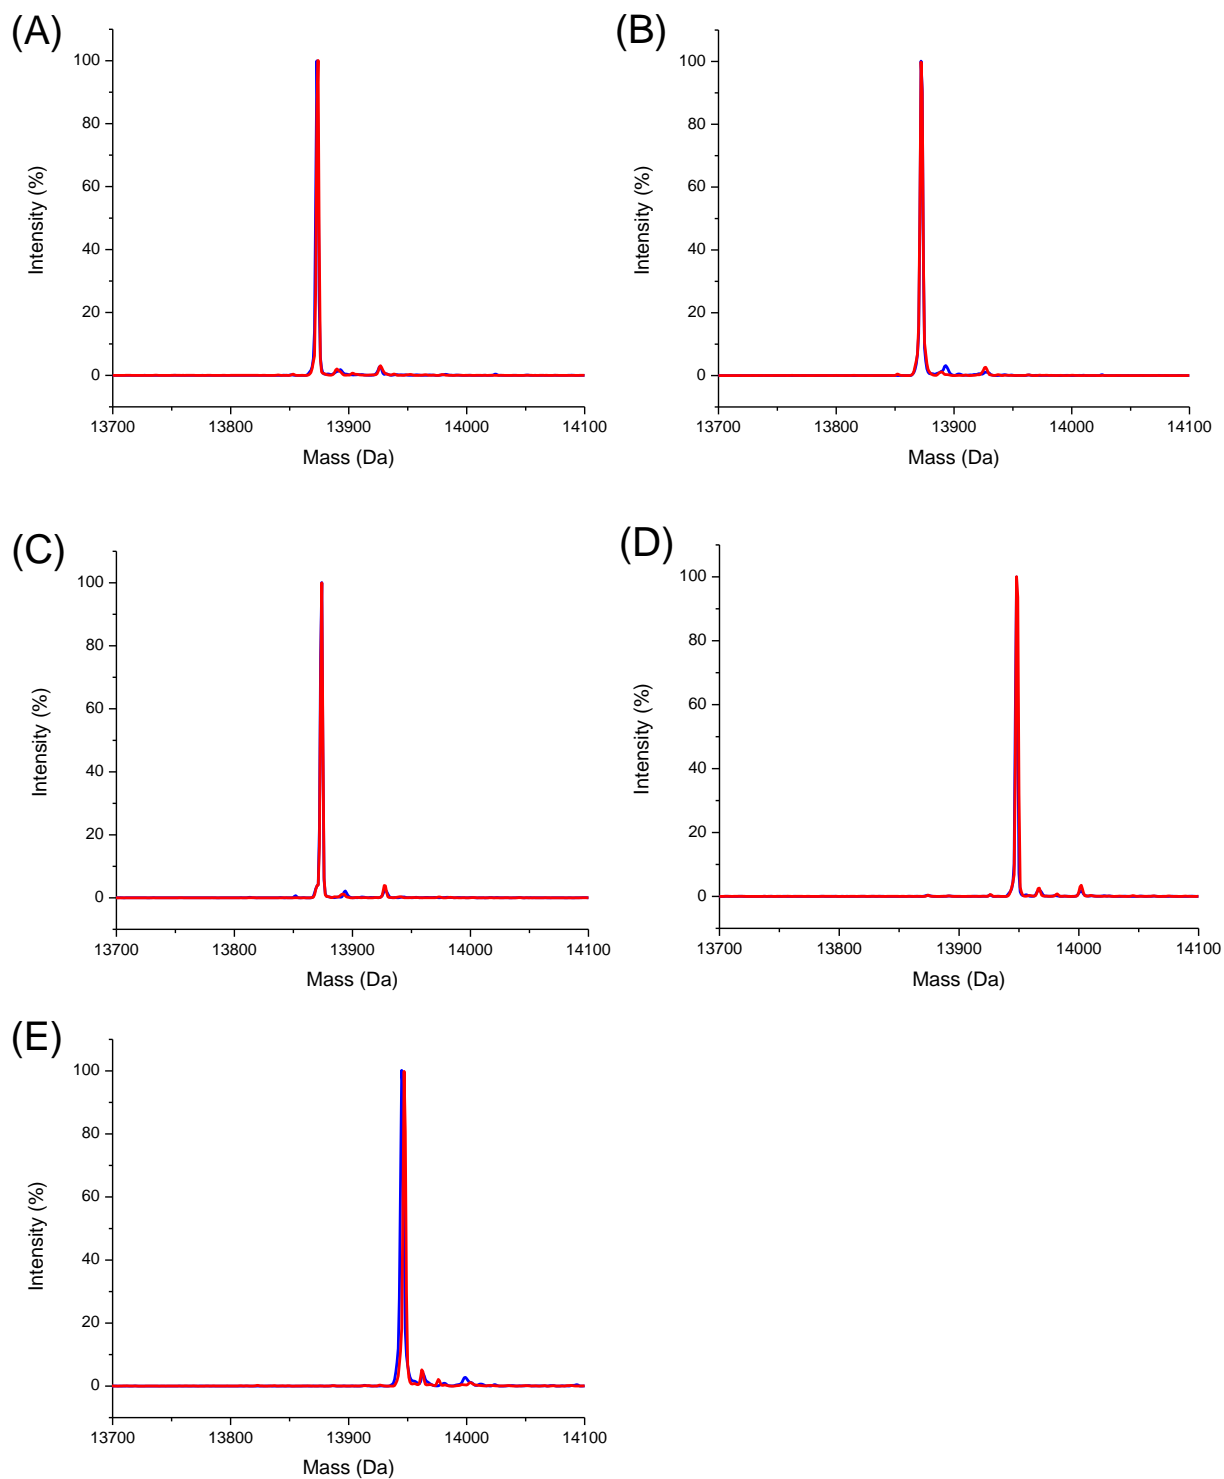

**Fig. S2.** Electro spray mass spectrum upon addition of 5 eq. H<sub>2</sub>O<sub>2</sub> to (A) Cu<sup>II</sup>-M121G; (B) apo-M121G; (C) Zn<sup>II</sup>-M121G; (D) Cu<sup>II</sup>-Wild-Type; and (E) Cu<sup>I</sup>-Wild-Type. Spectra in blue were obtained before oxidant addition, while spectra in red were obtained 30 minutes after H<sub>2</sub>O<sub>2</sub> addition. (For M121G azurin, cal. 13871.67 and obs. 13871 Da; for wild type azurin, cal. 13945.81 and obs. 13945 Da)

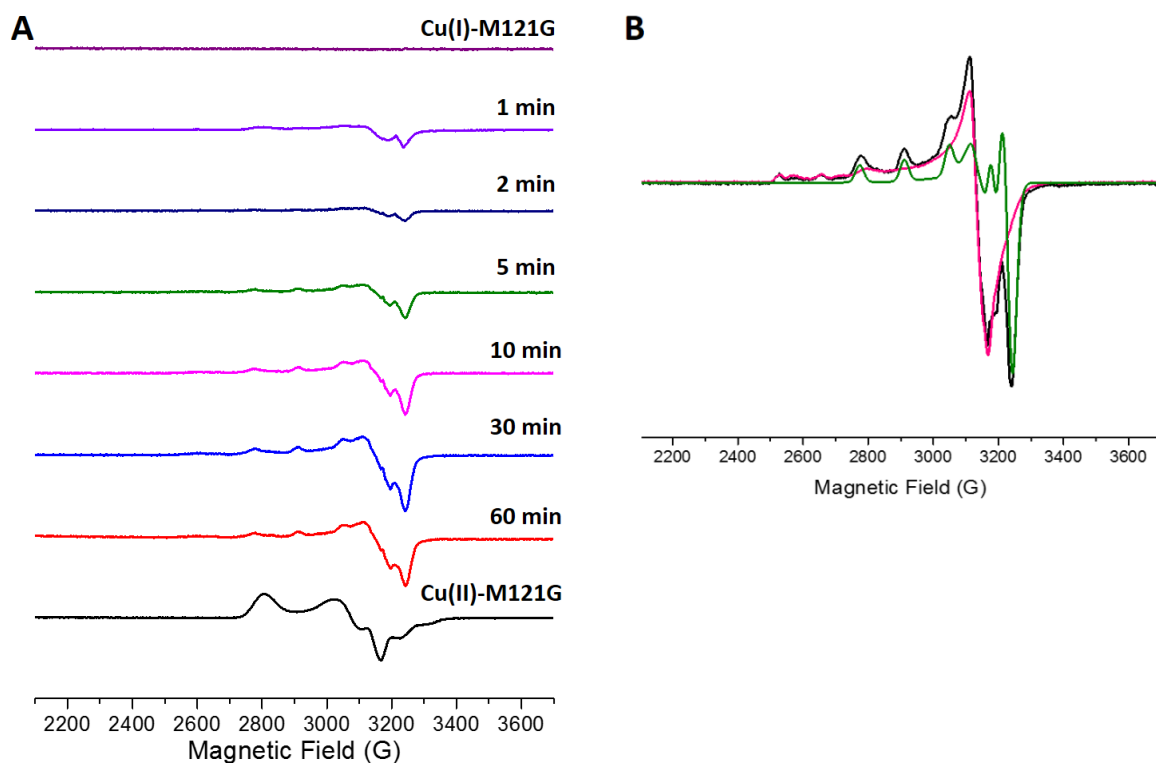

**Fig. S3.** EPR study and simulation of the air sensitive species. (A) Time-resolved X-band EPR spectra of a solution of 0.6 mM Cu(I)-M121G after addition of 5 eq. H<sub>2</sub>O<sub>2</sub> in 50 mM TIP7 buffer (pH 7.0) along with authentic Cu(II)-M121G (bottom). Reactions were performed anaerobically in an EPR tube and quenched via freezing in liquid N<sub>2</sub>. Spectra were collected at 30 K and were an average of 10 scans. Microwave frequency = 9.05 GHz; field modulation = 4.0 G; microwave power = 0.2 mW. (B) X-Band EPR spectra of Cu(I)-M121G azurin after incubating with 5 eq. H<sub>2</sub>O<sub>2</sub> for 30 min in 50 mM TIP7 buffer pH 7.0 (black), the resulted solution exposed to air (pink) and simulation of the air-sensitive species (green).

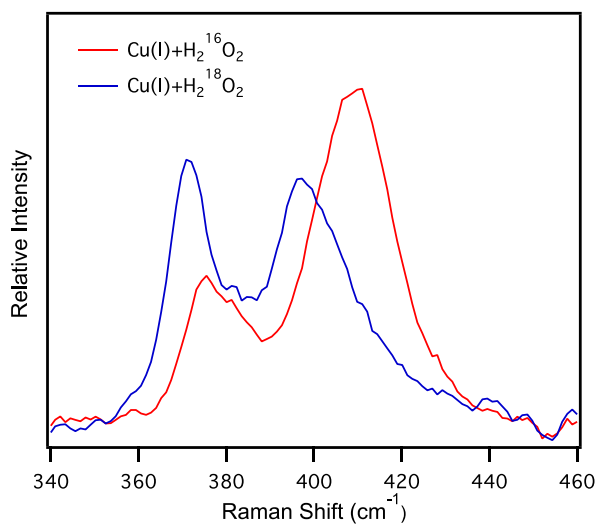

**Fig. S4.** Resonance Raman data ( $\lambda_{\text{ex}} = 457.9 \text{ nm}$ ) for Cu(I)M121G reacted with H<sub>2</sub><sup>16</sup>O<sub>2</sub> and H<sub>2</sub><sup>18</sup>O<sub>2</sub> at pH 7.

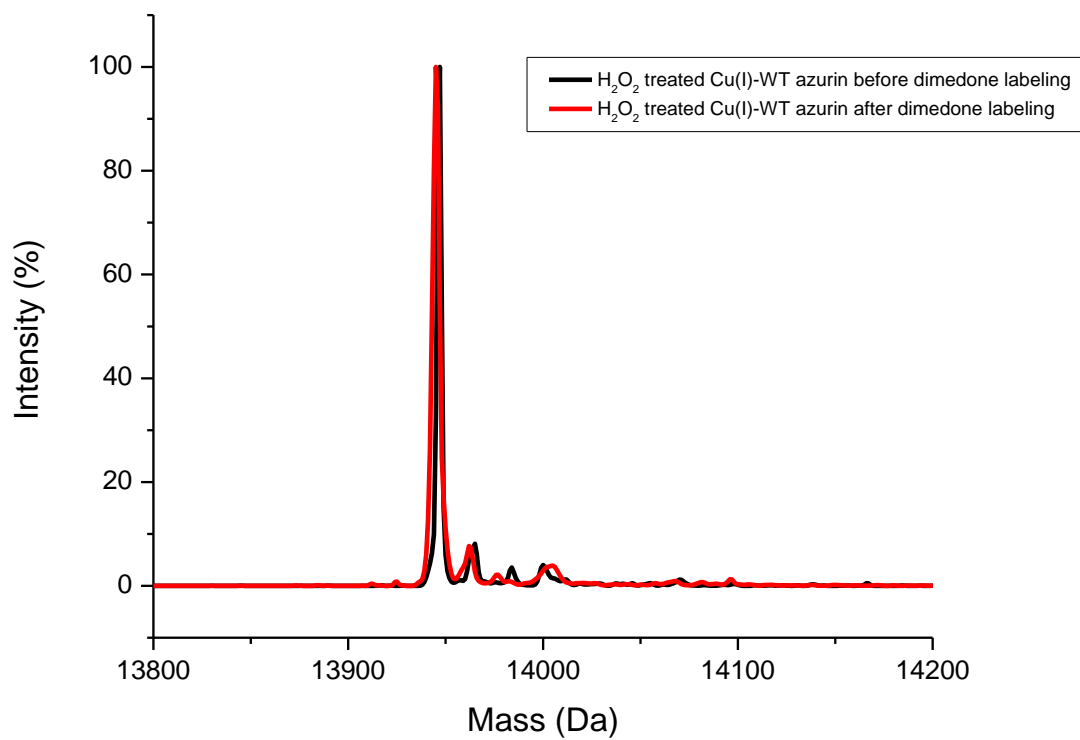

**Fig. S5.** Control experiment: ESI-MS of Cu(I)-Wild Type after H<sub>2</sub>O<sub>2</sub> treatment and dimerone labeling. (Cal. WT azurin: 13945.81, obs. 13946 Da)



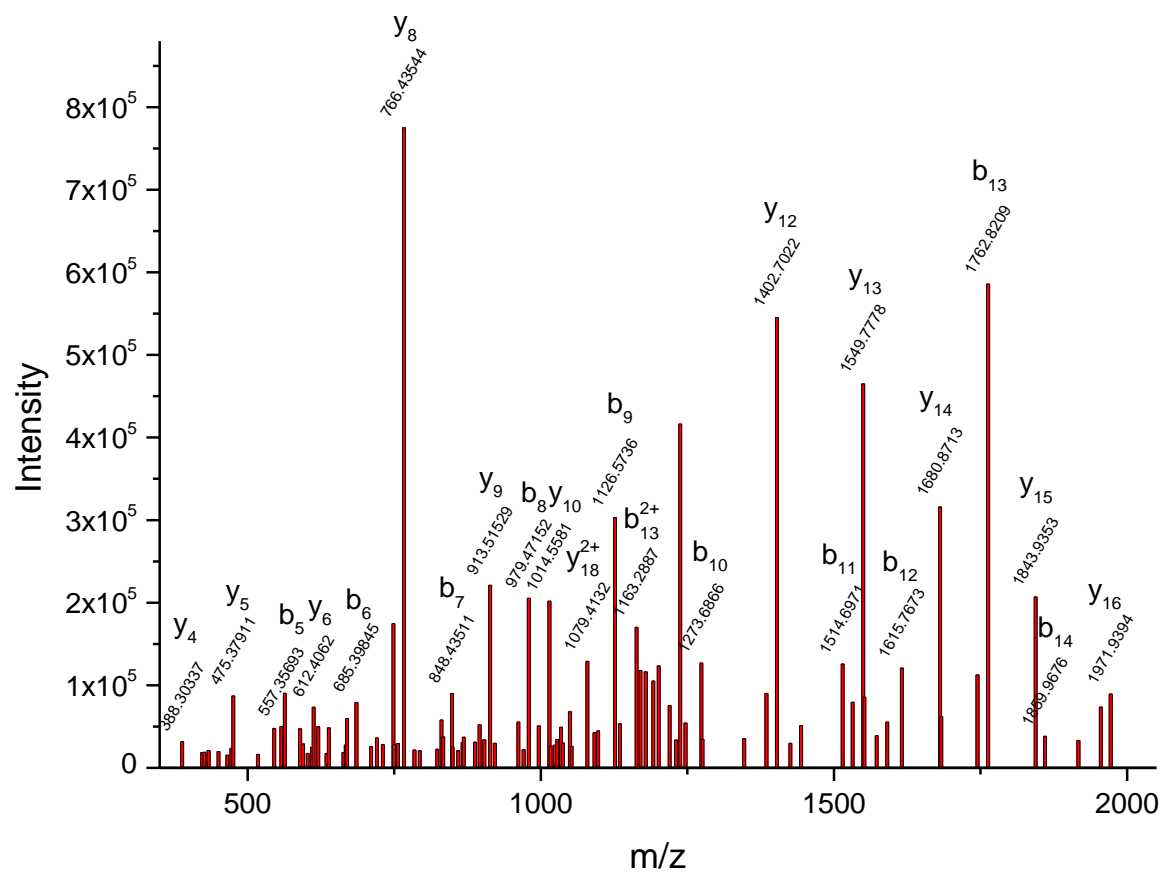

**Fig. S6.** MS/MS data of NH<sub>2</sub>-LKEGEQYMFF(C-dimedone)TFPGHSALGK-COOH formed from trypsin digestion of dimedone treated reaction solution. The precursor mass was  $m/z$  (2+) = 1264.5855 (cal.  $m/z$  (2+) = 1264.0998).

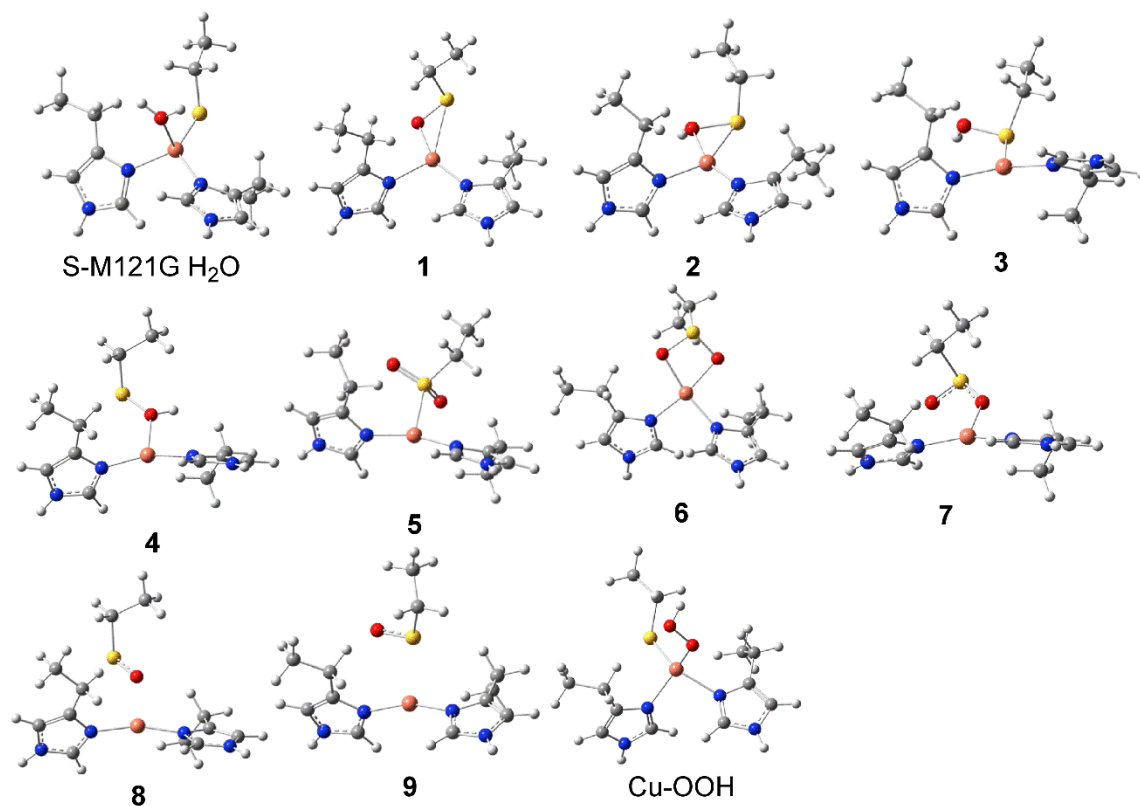

**Fig. S7.** Small DFT structures for M121G-H<sub>2</sub>O and models for the air-sensitive species. Atom coloring: Cu, pink; S, yellow; O, red; N, blue; C, grey; H, white.

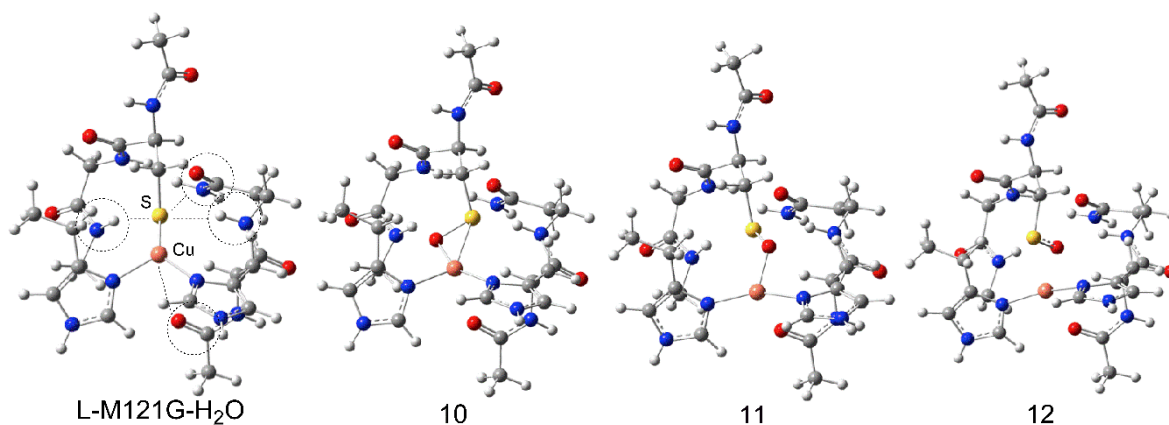

**Fig. S8.** Large DFT structures for M121G-H<sub>2</sub>O (L-M121G-H<sub>2</sub>O) and the air-sensitive species: pseudo-side-on (**10**), O-bound (**11**), and S-bound (**12**). Specific second sphere interactions are labeled in the L-M121G-H<sub>2</sub>O model. Atom coloring: Cu, pink; S, yellow; O, red; N, blue; C, grey; H, white.

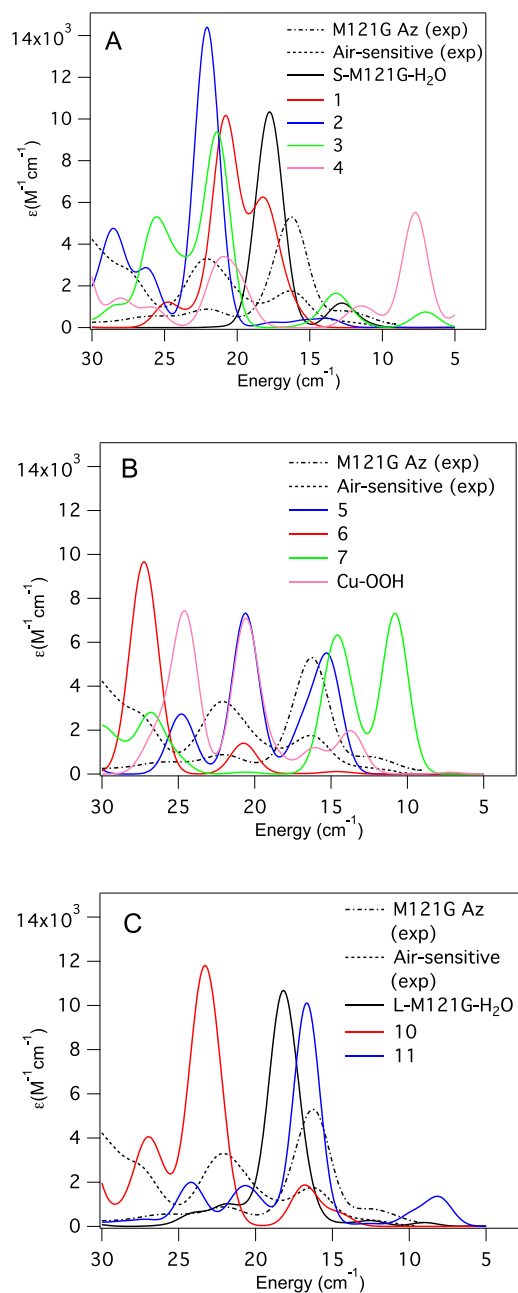

**Fig. S9.** Time dependent DFT calculated absorption spectra. TDDFT calculated absorption spectra for potential air-sensitive species (A) 1 – 4 and Cu(II)-M121G azurin (S-M121G-H<sub>2</sub>O), (B) 5 – 7 and Cu-OOH species (small models) and (C) 10 -11 and Cu(II)-M121G azurin (L-M121G-H<sub>2</sub>O).

**Table S1:** Summary of EPR spectral parameters and percentages for select complexes

| Species                 | $g_x, g_y, g_z$     | $A_x, A_y, A_z$ (Cu) ( $\times 10^{-4}$ cm $^{-1}$ ) | Percentage |
|-------------------------|---------------------|------------------------------------------------------|------------|
| Air-sensitive species   | 2.033, 2.041, 2.169 | 26.3, 17.8, 139.3                                    | 17.5 %     |
| Cu(II)-M121G azurin (A) | 2.024, 2.102, 2.294 | 42.3, 17.6, 18.1                                     | 10.9 %     |
| Cu(II)-M121G azurin (B) | 2.025, 2.042, 2.303 | 77.0, -, 11.5                                        | 8.1 %      |
| Type 2 Copper Site      | 2.038, 2.067, 2.276 | -, 19.7, 179.9                                       | 63.5 %     |

**Table S2.** Resonance Raman vibrational frequencies and isotope shifts obtained using  $\lambda_{\text{ex}} = 457.9$  nm for Cu(I) + H<sub>2</sub><sup>16</sup>O<sub>2</sub> and H<sub>2</sub><sup>18</sup>O<sub>2</sub>.

|    | H <sub>2</sub> <sup>16</sup> O <sub>2</sub> (cm $^{-1}$ ) | H <sub>2</sub> <sup>18</sup> O <sub>2</sub> (cm $^{-1}$ ) | $\Delta(16-18)$ (cm $^{-1}$ ) |
|----|-----------------------------------------------------------|-----------------------------------------------------------|-------------------------------|
| a  | 374                                                       | 371                                                       | 3                             |
| b  | 380                                                       | 380                                                       | 0                             |
| c  | 407                                                       | 395                                                       | 12                            |
| SO | 837                                                       | 807                                                       | 30                            |

**Table S3.** Main sequence ions detected within the error of the calculated value (highlighted in bold red). b\* means b type ion after deamination and b<sup>0</sup> means b type ion after dehydration. y\* means y type ion after deamination and y<sup>0</sup> means y type ion after dehydration.

| No. | b                | b <sup>+</sup> | b <sup>-</sup> | b <sup>2+</sup> | b <sup>0</sup>  | b <sup>0+</sup> | Seq.       | y                | y <sup>+</sup>  | y*               | y <sup>2+</sup> | y <sup>0</sup>   | y <sup>0+</sup> | No. |
|-----|------------------|----------------|----------------|-----------------|-----------------|-----------------|------------|------------------|-----------------|------------------|-----------------|------------------|-----------------|-----|
| 1   | 114.0913         | 57.5493        |                |                 |                 |                 | L          |                  |                 |                  |                 |                  |                 | 21  |
| 2   | 242.1863         | 121.597        | 225.1598       | 113.0835        |                 |                 | K          | 2415.1148        | 1208.061        | 2398.0883        | 1199.5478       | 2397.1042        | 1199.056        | 20  |
| 3   | 371.2289         | 186.118        | 354.2023       | 177.6048        | 353.2183        | 177.1128        | E          | 2287.0198        | 1144.014        | 2269.9933        | 1135.5003       | 2269.0093        | 1135.008        | 19  |
| 4   | 428.2504         | 214.629        | 411.2238       | 206.1155        | 410.2398        | 205.6235        | G          | 2157.9772        | <b>1079.492</b> | 2140.9507        | 1070.979        | 2139.9667        | 1070.487        | 18  |
| 5   | <b>557.293</b>   | 279.15         | 540.2664       | 270.6368        | 539.2824        | 270.1448        | E          | 2100.9558        | 1050.982        | 2083.9292        | 1042.4683       | 2082.9452        | 1041.976        | 17  |
| 6   | <b>685.3515</b>  | 343.179        | 668.325        | 334.6661        | 667.341         | 334.1741        | Q          | <b>1971.9132</b> | 986.4602        | <b>1954.8866</b> | 977.947         | 1953.9026        | 977.455         | 16  |
| 7   | <b>848.4149</b>  | 424.711        | 831.3883       | 416.1978        | <b>830.4043</b> | 415.7058        | Y          | <b>1843.8546</b> | 922.4309        | 1826.8281        | 913.9177        | 1825.844         | <b>913.4257</b> | 15  |
| 8   | <b>979.4553</b>  | 490.231        | 962.4288       | 481.718         | 961.4448        | 481.226         | M          | <b>1680.7913</b> | 840.8993        | 1663.7647        | 832.386         | 1662.7807        | 831.894         | 14  |
| 9   | <b>1126.5238</b> | 563.766        | 1109.497       | 555.2522        | 1108.513        | 554.7602        | F          | <b>1549.7508</b> | 775.379         | 1532.7243        | 766.8658        | 1531.7402        | <b>766.3738</b> | 13  |
| 10  | <b>1273.5922</b> | 637.3          | 1256.566       | 628.7865        | 1255.582        | 628.2944        | F          | <b>1402.6824</b> | 701.8448        | 1385.6558        | 693.3316        | <b>1384.6718</b> | 692.8395        | 12  |
| 11  | <b>1514.6694</b> | 757.838        | 1497.643       | 749.3251        | 1496.659        | 748.8331        | C-dimedone | 1255.614         | 628.3106        | 1238.5874        | 619.7973        | <b>1237.6034</b> | 619.3053        | 11  |
| 12  | <b>1615.7171</b> | 808.362        | 1598.691       | 799.8489        | 1597.707        | 799.3569        | T          | <b>1014.5367</b> | 507.772         | 997.5102         | 499.2587        | 996.5261         | 498.7667        | 10  |
| 13  | <b>1762.7855</b> | 881.896        | 1745.759       | 873.3831        | <b>1744.775</b> | 872.8911        | F          | <b>913.489</b>   | 457.2482        | 896.4625         | 448.7349        | 895.4785         | 448.2429        | 9   |
| 14  | <b>1859.8383</b> | 930.423        | 1842.812       | 921.9095        | 1841.828        | 921.4175        | P          | <b>766.4206</b>  | 383.7139        | 749.3941         | 375.2007        | 748.41           | 374.7087        | 8   |
| 15  | 1916.8598        | 958.934        | 1899.833       | 950.4202        | 1898.849        | 949.9282        | G          | 669.3679         | 335.1876        | 652.3413         | 326.6743        | 651.3573         | 326.1823        | 7   |
| 16  | 2053.9187        | 1027.46        | 2036.892       | 1018.9497       | 2035.908        | 1018.458        | H          | <b>612.3464</b>  | 306.6768        | 595.3198         | 298.1636        | 594.3358         | 297.6715        | 6   |
| 17  | 2140.9507        | 1070.98        | 2123.924       | 1062.4657       | 2122.94         | 1061.974        | S          | <b>475.2875</b>  | 238.1474        | 458.2609         | 229.6341        | 457.2769         | 229.1421        | 5   |
| 18  | 2211.9878        | 1106.5         | 2194.961       | 1097.9843       | 2193.977        | 1097.492        | A          | <b>388.2554</b>  | 194.6314        | 371.2289         | 186.1181        |                  |                 | 4   |
| 19  | 2325.0719        | 1163.04        | 2308.045       | 1154.5263       | 2307.061        | 1154.034        | L          | 317.2183         | 159.1128        | 300.1918         | 150.5995        |                  |                 | 3   |
| 20  | 2382.0933        | 1191.55        | 2365.067       | 1183.037        | 2364.083        | 1182.545        | G          | 204.1343         | 102.5708        | 187.1077         | 94.0575         |                  |                 | 2   |
| 21  |                  |                |                |                 |                 |                 | K          | 147.1128         | 74.06           | 130.0863         | 65.5468         |                  |                 | 1   |

**Table S4.** Comparison between experimental bond distances and DFT structures for small M121G models and possible structures for the air-sensitive species.

|                            | Bond Distances |                   |                       |                   | Mulliken Spin Densities (PCM $\epsilon = 4.0$ ) |                        |
|----------------------------|----------------|-------------------|-----------------------|-------------------|-------------------------------------------------|------------------------|
|                            | Cu-S (Å)       | Cu-O (Å)          | Cu-N (Å) <sup>a</sup> | S-O (Å)           | Cu                                              | S/O                    |
| Cu(II)-M121G azurin (exp.) | 2.2            | 2.9 <sup>b</sup>  | 2.0                   | --                | --                                              | --                     |
| S-M121G-H <sub>2</sub> O   | 2.18           | 2.52 <sup>b</sup> | 2.04                  | --                | 0.37                                            | 0.54/--                |
| <b>1</b>                   | 2.63           | 1.92              | 2.02                  | 1.61              | 0.31                                            | 0.37/0.25              |
| <b>2</b>                   | 2.48           | 2.09              | 1.97                  | 1.73              | 0.52                                            | 0.19/0.07              |
| <b>3</b>                   | 2.41           | --                | 1.93                  | 1.66              | 0.47                                            | 0.32/0.04              |
| <b>4</b>                   | --             | 2.07              | 1.93                  | 1.72              | 0.57                                            | 0.20/0.05              |
| <b>5</b>                   | 2.53           | --                | 1.94                  | 1.49 <sup>c</sup> | 0.22                                            | 0.21/0.38 <sup>d</sup> |
| <b>6</b>                   | --             | 2.00 <sup>e</sup> | 2.01                  | 1.59 <sup>c</sup> | 0.61                                            | 0.02/0.20 <sup>d</sup> |
| <b>7</b>                   | --             | 2.04              | 1.96                  | 1.53 <sup>c</sup> | 0.31                                            | 0.16/0.38 <sup>d</sup> |
| <b>8</b>                   | --             | 2.32              | 1.94                  | 1.55              | 0.03                                            | 0.55/0.40              |
| <b>9</b>                   | 2.77           | --                | 1.94                  | 1.54              | 0.07                                            | 0.44/0.42              |
| Cu-OOH                     | 2.28           | 1.90              | 2.15                  | 1.44 <sup>f</sup> | 0.45                                            | 0.24/0.23              |
| L-M121G-H <sub>2</sub> O   | 2.17           | 2.48              | 1.99                  | --                | 0.59                                            | 0.25/--                |
| <b>10</b>                  | --             | 1.90              | 1.98                  | 1.60              | 0.50                                            | 0.16/0.28              |
| <b>11</b>                  | 2.79           | --                | 1.92                  | 1.54              | 0.15                                            | 0.46/0.34              |

<sup>a</sup> Averages of Cu-N(Im) distances.

<sup>b</sup> Axial Cu-OH<sub>2</sub> distance.

<sup>c</sup> Average distance for SO<sub>2</sub>.

<sup>d</sup> Sum over both O atoms.

<sup>e</sup> Average of Cu-O distances.

<sup>f</sup> O-O distance.

**Table S5.** DFT vibrational frequencies for small M121G models and potential structures of the air-sensitive species.

| Model                     | $\nu(\text{Cu-S})$ (cm <sup>-1</sup> )<br>exp        | $\nu(\text{Cu-S})$ (cm <sup>-1</sup> )<br>calc       |                              |                                                         |
|---------------------------|------------------------------------------------------|------------------------------------------------------|------------------------------|---------------------------------------------------------|
| M121G<br>H <sub>2</sub> O | 400                                                  | 408/413                                              |                              |                                                         |
|                           | $\nu(\text{H}_2^{16}\text{O}_2)$ (cm <sup>-1</sup> ) | $\nu(\text{H}_2^{18}\text{O}_2)$ (cm <sup>-1</sup> ) | $\Delta$ (cm <sup>-1</sup> ) | assignment                                              |
| <b>1</b>                  | 418/442                                              | 412/431                                              | 6/11                         | Cu-O                                                    |
|                           | 832                                                  | 803                                                  | 29                           | S-O                                                     |
| <b>2</b>                  | 307/315/379                                          | 304/314/377                                          | 3/1/2                        | Cu-S(OH)                                                |
|                           | 713                                                  | 689                                                  | 24                           | S-O                                                     |
| <b>3</b>                  | 303/391                                              | 302/390                                              | 1/1                          | Cu-S(OH)                                                |
|                           | 767/791                                              | 748/784                                              | 19/7                         | S-O                                                     |
| <b>4</b>                  | 291                                                  | 284                                                  | 7                            | Cu-OH                                                   |
|                           | 392                                                  | 389                                                  | 3                            | S-C <sub>β</sub> -C <sub>α</sub> + C <sub>β</sub> -S-OH |
|                           | 677                                                  | 654                                                  | 23                           | S-O                                                     |
| <b>5</b>                  | 311                                                  | 308                                                  | 3                            | Cu-S                                                    |
|                           | 415/418                                              | 401/417                                              | 14/1                         | O-S-O                                                   |
|                           | 493                                                  | 487                                                  | 6                            | Cu-S                                                    |
|                           | 1013/1174                                            | 977/1140                                             | 36/34                        | S-O (as)/S-O (s)                                        |
| <b>6</b>                  | 345                                                  | 343                                                  | 2                            | Cu-O(s) + Cu-N                                          |
|                           | 365                                                  | 353                                                  | 12                           | Cu-O(as)                                                |
|                           | 504/579                                              | 492/561                                              | 12/18                        | Cu-O(s) + O-S-O +<br>S-C-C                              |
|                           | 829/884                                              | 803/850                                              | 26/34                        | S-O(as)/S-O(s)                                          |
| <b>7</b>                  | 248                                                  | 241                                                  | 7                            | Cu-O                                                    |

|        |     |     |    |                                 |
|--------|-----|-----|----|---------------------------------|
|        | 341 | 331 | 10 | SO <sub>2</sub> -C <sub>β</sub> |
|        | 376 | 370 | 6  | C <sub>β</sub> -S-O             |
|        | 447 | 433 | 14 | O-S-O                           |
| Cu-OOH | 375 | 374 | 1  | Cu-S                            |
|        | 459 | 437 | 12 | Cu-OOH                          |
|        | 891 | 840 | 49 | O-OH                            |



**Table S6.** DFT vibrational frequencies for large M121G models and potential structures of the air-sensitive species.

| Model                       | $\nu(\text{Cu-S}) (\text{cm}^{-1})$<br>exp.      | $\nu(\text{Cu-S}) (\text{cm}^{-1})$ calc.        |                          |            |
|-----------------------------|--------------------------------------------------|--------------------------------------------------|--------------------------|------------|
| L-M121G<br>H <sub>2</sub> O | 400                                              | 384/403/406                                      |                          |            |
|                             | $\nu(\text{H}_2^{16}\text{O}_2)(\text{cm}^{-1})$ | $\nu(\text{H}_2^{18}\text{O}_2)(\text{cm}^{-1})$ | $\Delta(\text{cm}^{-1})$ | assignment |
| <b>10 (SO)</b>              | 448/457                                          | 432/445                                          | 16/12                    | Cu-O       |
|                             | 824                                              | 796                                              | 28                       | S-O        |
| <b>11 (O)</b>               | 387/463/477                                      | 381/461/467                                      | 6/2/10                   | Cu-O       |
|                             | 820                                              | 801/772                                          | 19/48                    | S-O        |

**Table S7.** DFT structures for large M121G models and potential structures of the air-sensitive species upon removal of specific second sphere interactions.

|                       | <b>10</b>      | Cu-<br>Dipole <sup>a</sup> | H-<br>bonds | S-<br>Dipole | Cu-<br>Dipole/H-<br>bonds | <b>11</b> | Cu-<br>Dipole | H-<br>bonds | S-<br>Dipole | <b>Cu-<br/>Dipole/H-<br/>bonds<sup>b</sup></b> |
|-----------------------|----------------|----------------------------|-------------|--------------|---------------------------|-----------|---------------|-------------|--------------|------------------------------------------------|
|                       | Bond Distances |                            |             |              |                           |           |               |             |              |                                                |
| Cu-<br>O              | 1.93           | 1.92                       | 1.91        | 1.92         | 1.90                      | 1.91      | 1.96          | 1.94        | 1.90         | <b>2.19</b>                                    |
| Cu-<br>S              | 2.42           | 2.40                       | 2.43        | 2.45         | 2.43                      | --        | --            | --          | --           | --                                             |
| Cu-<br>N <sup>c</sup> | 1.99           | 1.97                       | 1.99        | 1.99         | 1.98                      | 1.98      | 1.94          | 1.96        | 1.97         | <b>1.90</b>                                    |
| S-<br>O               | 1.62           | 1.62                       | 1.61        | 1.62         | 1.61                      | 1.60      | 1.57          | 1.59        | 1.60         | <b>1.55</b>                                    |
|                       | Spin Densities |                            |             |              |                           |           |               |             |              |                                                |
| Cu                    | 0.48           | 0.43                       | 0.47        | 0.51         | 0.39                      | 0.44      | 0.26          | 0.33        | 0.49         | <b>0.06</b>                                    |
| O                     | 0.20           | 0.21                       | 0.23        | 0.19         | 0.23                      | 0.30      | 0.36          | 0.33        | 0.29         | <b>0.41</b>                                    |
| S                     | 0.21           | 0.25                       | 0.25        | 0.18         | 0.30                      | 0.19      | 0.33          | 0.31        | 0.16         | <b>0.51</b>                                    |

<sup>a</sup> Indicator of which second sphere interaction has been removed.

<sup>b</sup> Only this combination results in reduction of Cu as discussed in the manuscript text.

<sup>c</sup> Average of two Cu-N(His) distance.

**Table S8.** Diffraction and refinement data for Cu(II)-M121G azurin crystal structure.

|                                      | <b>Cu(II)-M121G Az</b>      |
|--------------------------------------|-----------------------------|
| <b>Data collection</b>               |                             |
| Beamline                             | 21-ID-F                     |
| Wavelength (Å)                       | 0.97872                     |
| Space Group                          | C 2 2 21                    |
| Cell dimension<br><i>a, b, c</i> (Å) | 55.75 145.8 97.09           |
| Resolution (Å)                       | 50-1.54 (1.57-1.54)         |
| R-merge                              | 0.069 (0.376)               |
| I/σI                                 | 33.88 (7.22)                |
| No. of unique reflections            | 53091 (2616)                |
| Completeness (%)                     | 90.5 (91.1)                 |
| Redundancy                           | 6.8 (6.5)                   |
| <b>Refinement</b>                    |                             |
| Resolution (Å)                       | 29.15-1.54 (1.58-1.54)      |
| Reflections in free set              | 2648 (5%)                   |
| Rwork/Rfree                          | 0.1704(0.229)/0.1936(0.262) |
| No. reflections                      | 50042                       |
| No. atoms                            | 3291                        |
| Protein                              | 2916                        |
| Cu                                   | 6                           |
| Water                                | 340                         |

|                           |       |
|---------------------------|-------|
| Metal Ion                 | Cu    |
| B-factor                  | 13.00 |
| Protein                   | 12.10 |
| Cu                        | 13.38 |
| Water                     | 20.80 |
| ESU(ML)                   | 0.044 |
| Rms. deviations           |       |
| Bond lengths (Å)          | 0.023 |
| Bond angles (o)           | 2.123 |
| Ramachandran favored (%)  | 98    |
| Ramachandran outliers (%) | 0     |
